# Supplementary material for: Histone exchange is associated with activator function at transcribed promoters and with repression at histone loci
Source: PubMed Central journal article supplement — Sci Adv. 2020 Sep 2;6(36):eabb0333. doi: 10.1126/sciadv.abb0333 (PMC7467701; doi:10.1126/sciadv.abb0333), 2020-09-02
Supplement: abb0333_SM.pdf [file abb0333_SM.pdf]

[advances.sciencemag.org/cgi/content/full/6/36/eabb0333/DC1](https://advances.sciencemag.org/cgi/content/full/6/36/eabb0333/DC1)

## Supplementary Materials for

### **Histone exchange is associated with activator function at transcribed promoters and with repression at histone loci**

Sari Kassem, Paolo Ferrari, Amanda L. Hughes, Julien Soudet, Oliver J. Rando, Michel Strubin\*

\*Corresponding author. Email: [michel.strubin@unige.ch](mailto:michel.strubin@unige.ch)

Published 2 September 2020, *Sci. Adv.* **6**, eabb0333 (2020)

DOI: [10.1126/sciadv.abb0333](https://doi.org/10.1126/sciadv.abb0333)

#### **This PDF file includes:**

Figs. S1 to S10  
Tables S1 to S4  
References

A

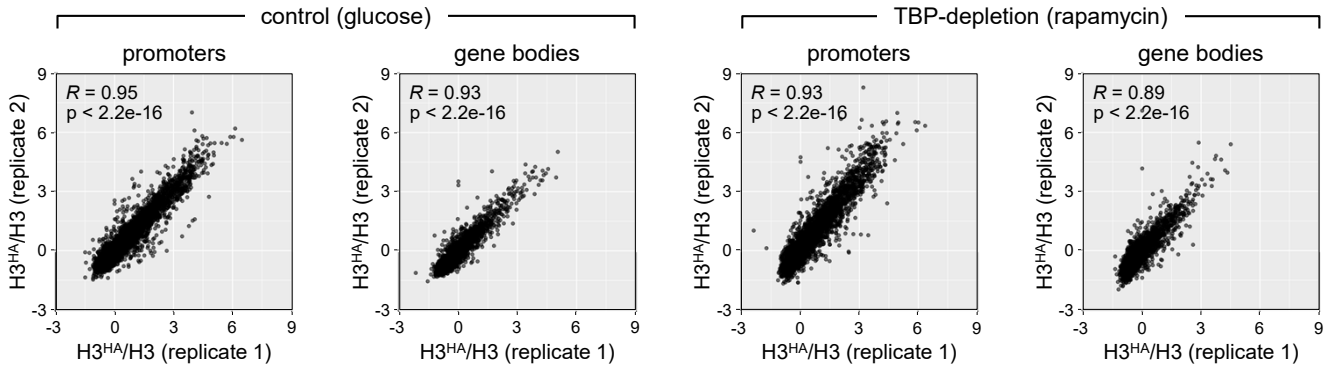

B

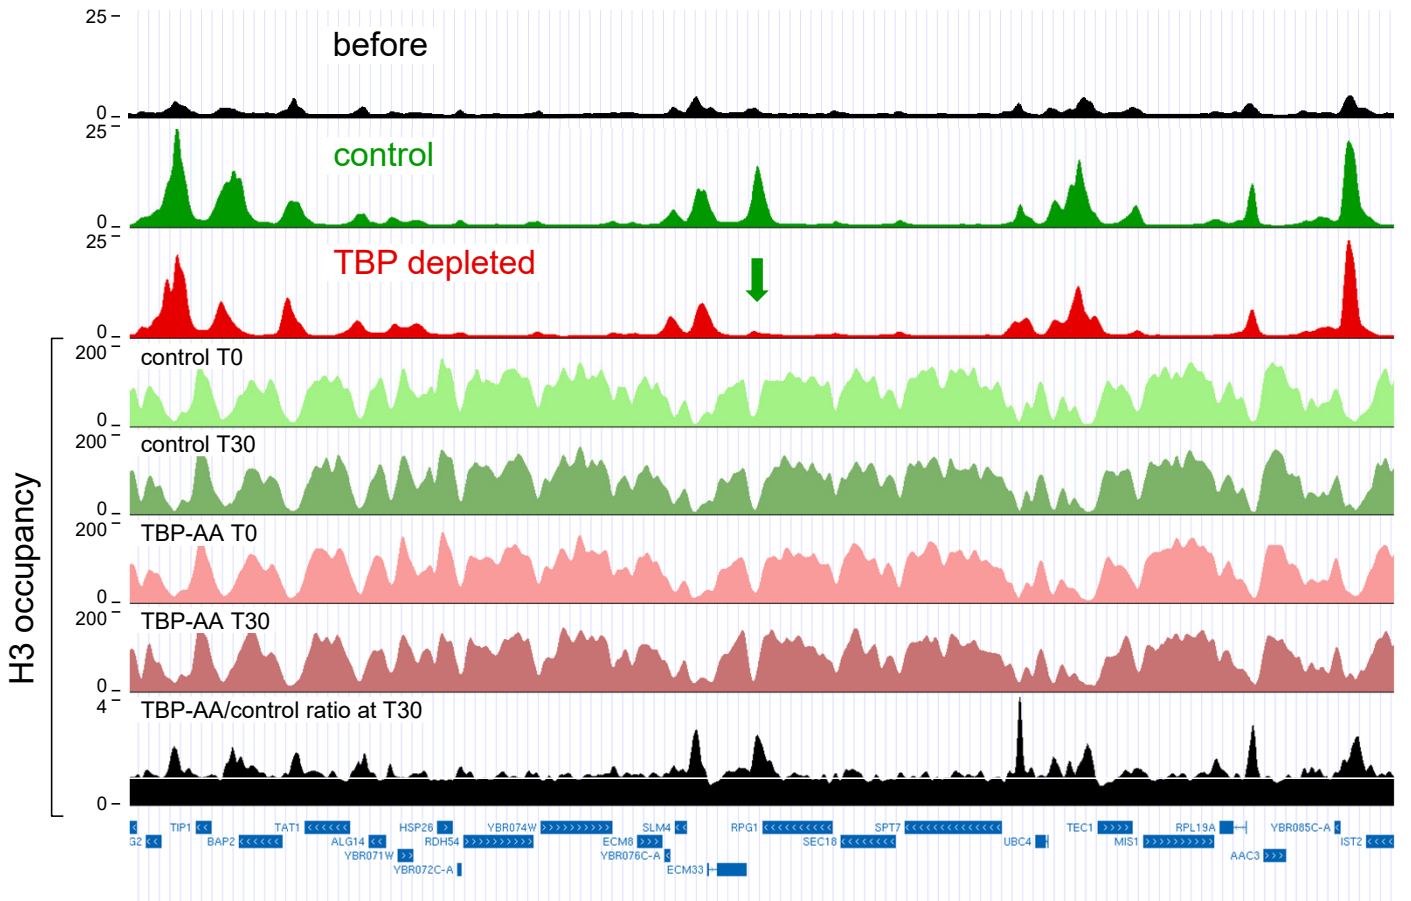

C

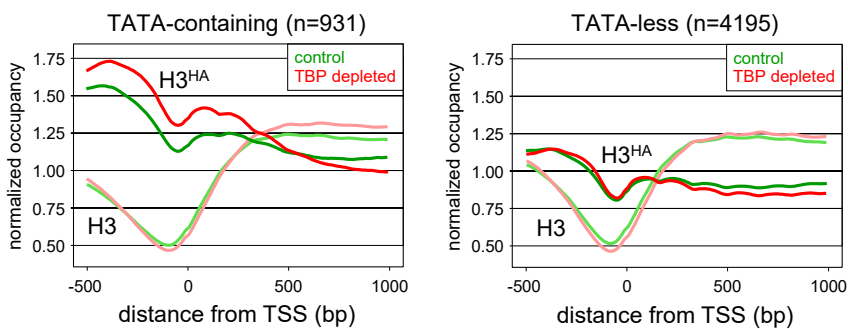

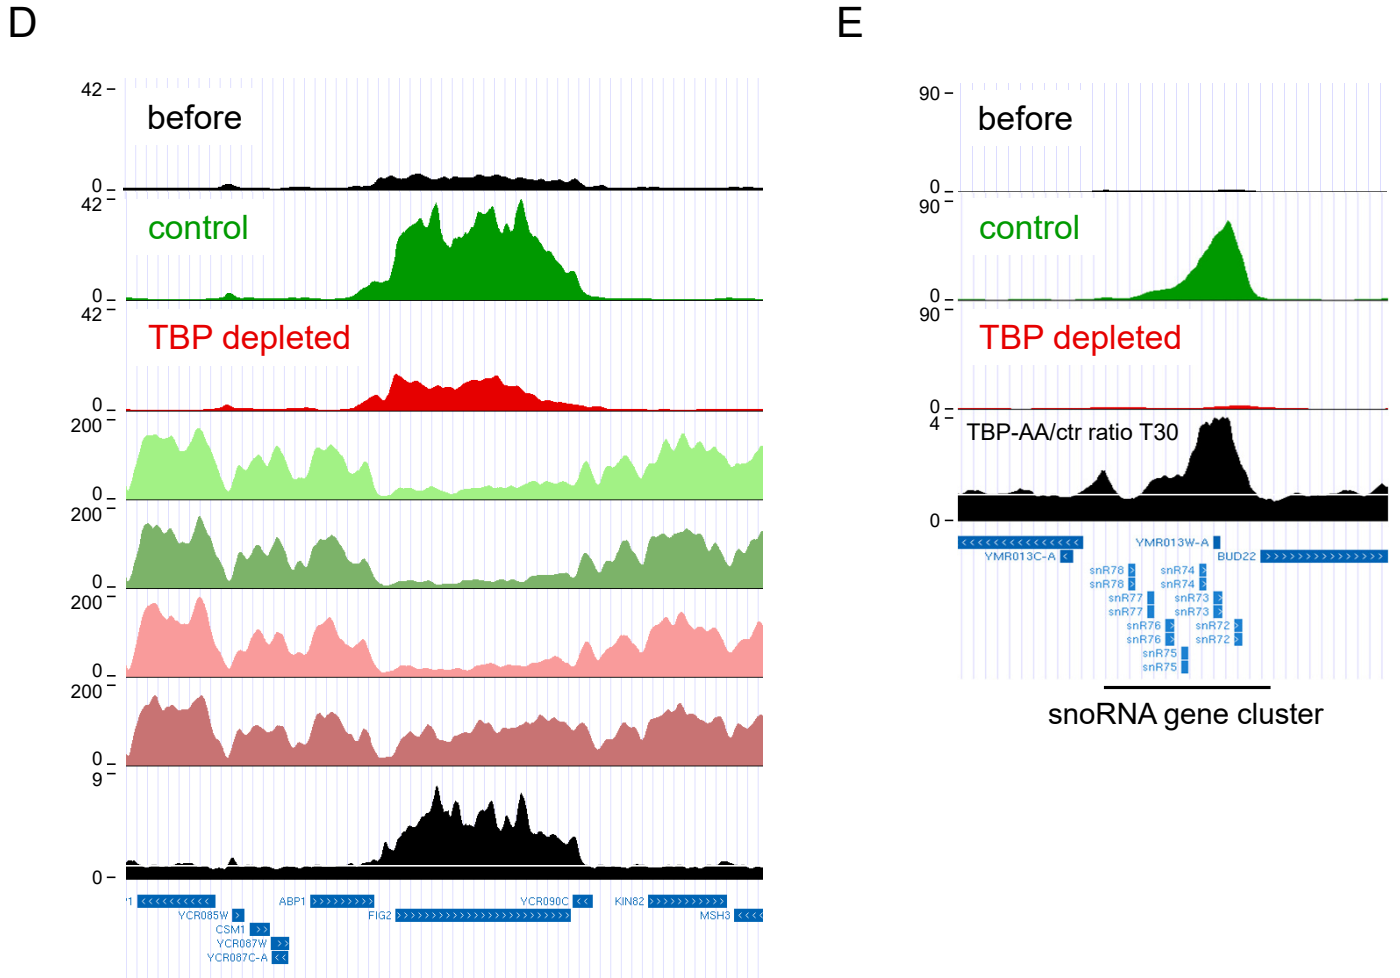

**Fig. S1. Histone exchange and nucleosome occupancy in the absence of TBP. Related to Fig. 1.**

(A) Comparison of the H3<sup>HA</sup> enrichment over promoters (-500 to TSS) and gene bodies (TSS to +1000 bp) shows good reproducibility between two independent biological ChIP-Seq replicates. R values were calculated using the `stat_cor` function of the `ggpubr` package (57).

(B) Genome browser view of a region in chromosome II (365,000-425,000) showing TBP-dependent H3<sup>HA</sup> incorporation between two genes (*ECM33* and *RPG1*; see arrow) oriented in a tail-to-tail fashion. Shown on top is a T0 time point control (before) when H3<sup>HA</sup> is expressed at low levels prior to galactose induction. Shown below is H3 occupancy at T0 and T30 under control or TBP-depletion (TBP-AA) conditions as indicated. Regions of high histone exchange often show increased nucleosome occupancy upon TBP depletion (lower panel with white bar set to 1.0).

(C) Replicate of Fig. 1C.

(D) The *FIG2* gene is one of the very few RNA pol II genes showing high histone turnover over the gene body. Another example is *YHR020W*. Note that depletion of TBP results in a marked increase in nucleosome occupancy. Data are presented as in (C).

(E) High TBP-dependent histone turnover over a snoRNA gene cluster. Note that an increase in H3 occupancy following TBP depletion occurs in the absence of H3<sup>HA</sup> incorporation, thus pointing to two independent events. The increase in histone occupancy must be rapid, occurring prior to the onset of H3<sup>HA</sup> expression.

A

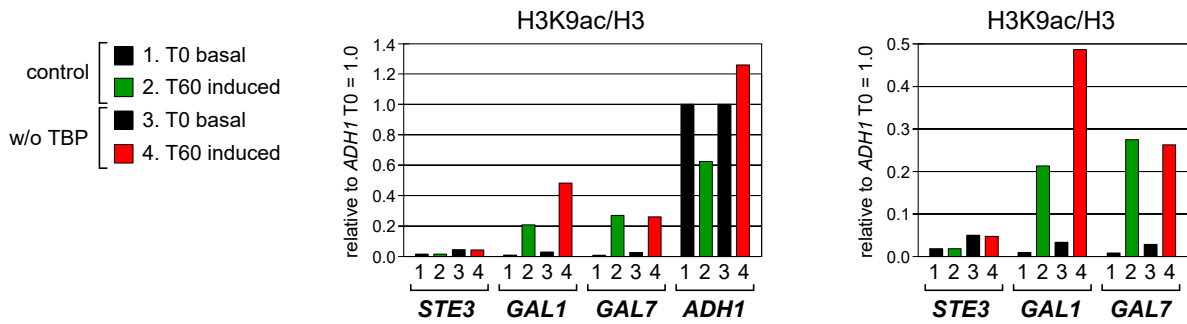

B

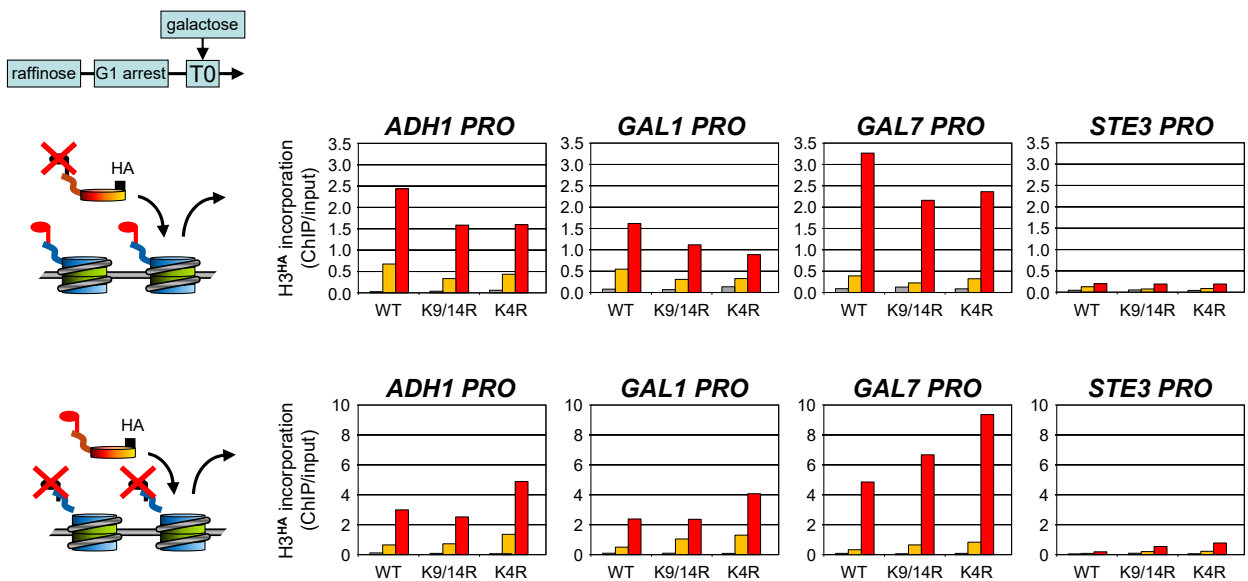

**Fig. S2. Histone exchange and modifications at *GAL* genes. Related to Fig. 2.**

(A) Galactose activation of the *GAL* genes is associated with increased H3K9/14ac at the promoter independently of TBP. Shown are the ChIP signals for H3K9/14ac normalized to H3 occupancy just prior to (T0) and at 60 min (T60) after galactose induction under control or TBP-depletion conditions. Right panel: without *ADH1*.

(B) Histone exchange at the active *GAL* promoters occurs independently of H3K4me and H3K9/14ac. Upper panels: incorporation of HA-tagged histone H3 K4R and K9/14R modification mutants in a wild-type chromatin background. Lower panel: incorporation of wild-type H3 in a chromatin containing the H3 modification mutants. Shown are the amounts of tagged histones detected just prior to (gray bars) and at 30 min (orange bars) and 60 min (red bars) after galactose induction of H3<sup>HA</sup>. Data for the control *ADH1* and *STE3* gene promoters are from (41).

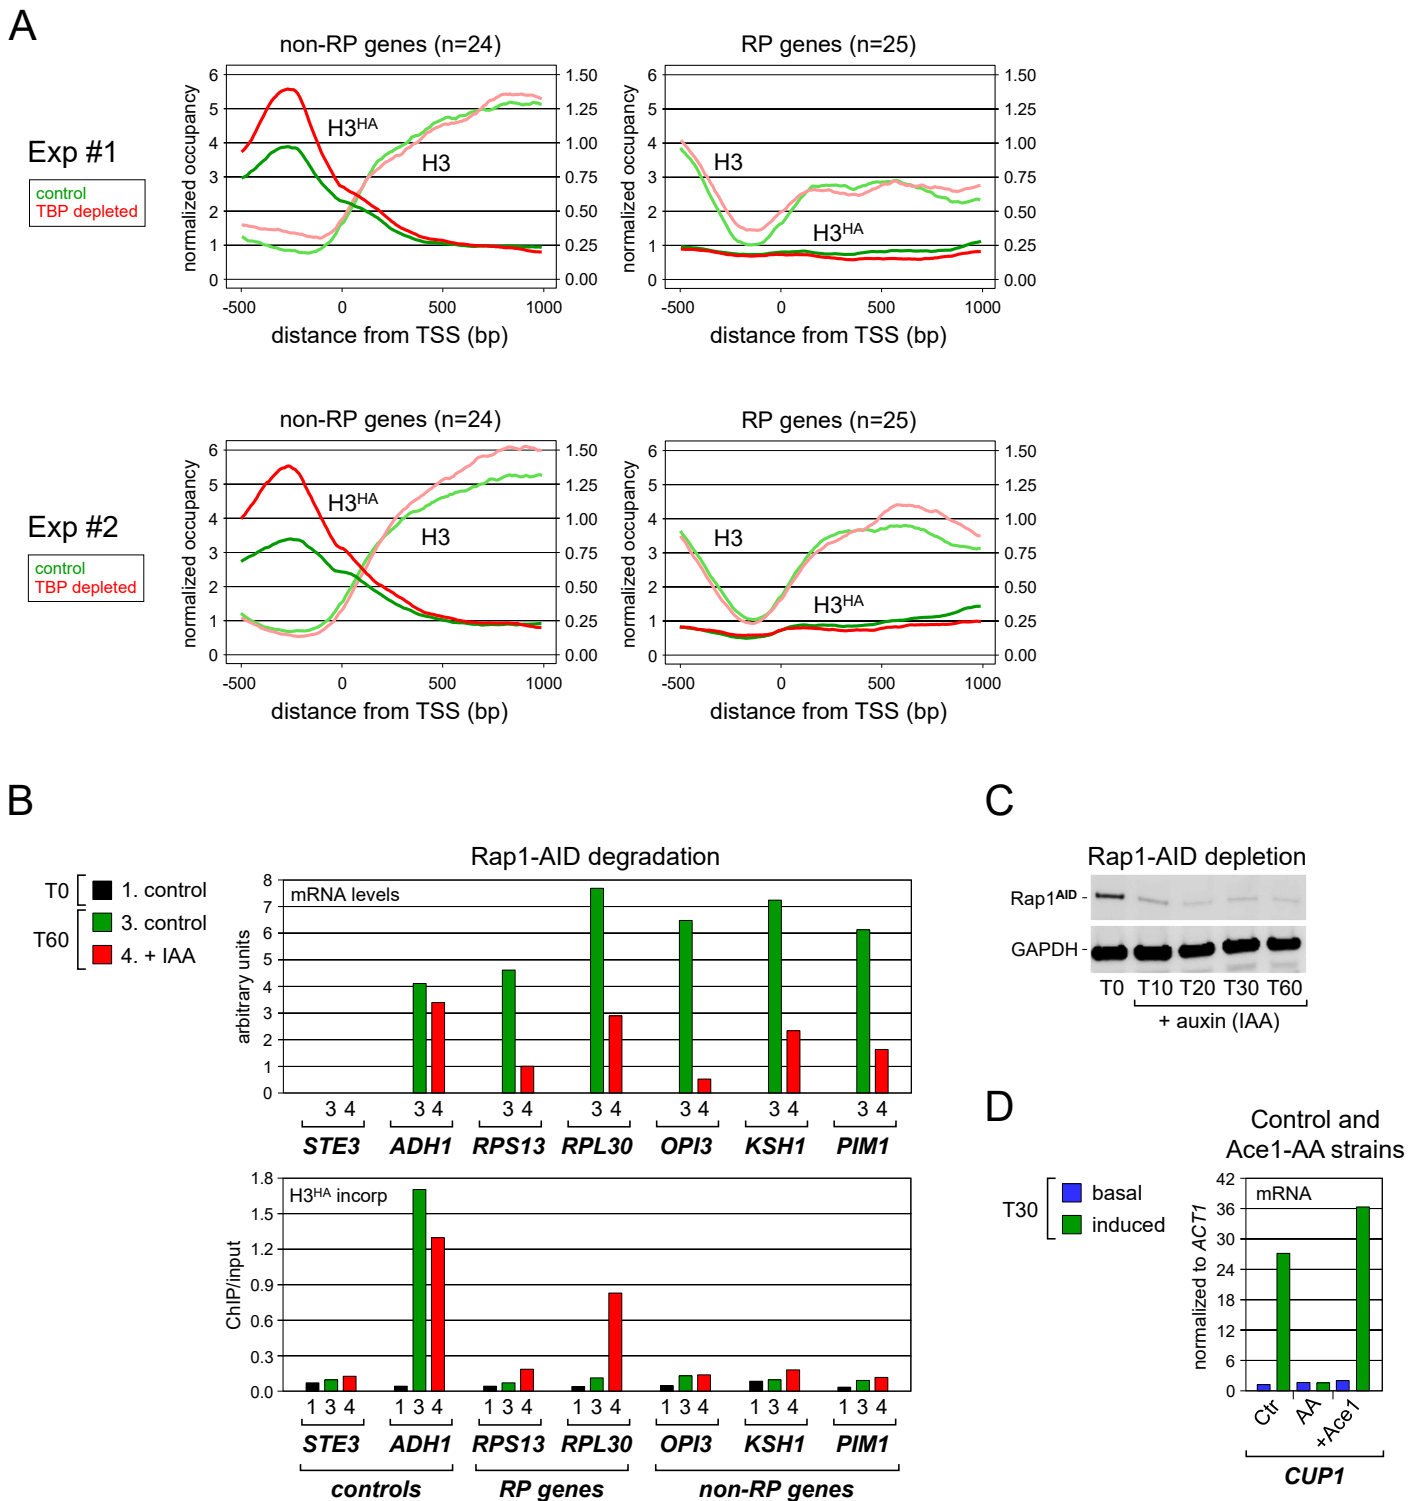

**Fig. S3. Lack of histone exchange at Rap1-dependent RP and non-RP gene promoters. Related to Fig. 5.**

(A) Low histone exchange at RP gene promoters in the presence or absence of TBP. Metagenome analysis of the average H3<sup>HA</sup> incorporation and H3 occupancy under control (green) or TBP-depletion (red) conditions; left panels show a selected set of non-RP genes with high turnover at their promoters, right panels show RP genes (gene lists can be found in Table S4). The results are

presented as in Fig. 1C. The scale for H3 occupancy is on the right axis. Note that H3 levels are similar at both sets of promoters, indicating that the difference in HA<sup>H3</sup> incorporation between these gene sets is not simply a result of H3 occupancy differences. Also see Fig. 1C.

**(B)** Same experiment as in Fig. 5C but including three Rap1-regulated non-RP genes. The genes were selected based on ChIP-Seq (58) and RNA-Seq (59) studies. The OPI3 mRNA signal, and the KSH1 and PIM1 mRNA signals were multiplied, respectively, by 8 and 100 to facilitate comparison.

**(C)** Time course analysis of auxin-mediated degradation of Rap1 fused to AID. Rap1-AID was detected using anti-Rap1 antibodies.

**(D)** Control experiment for Fig. 5E showing that anchor-away of Ace1 (AA) in the parental strain abrogates copper-mediated activation of *CUP1* and that normal activation is restored upon ectopic expression of Ace1 (+Ace1).

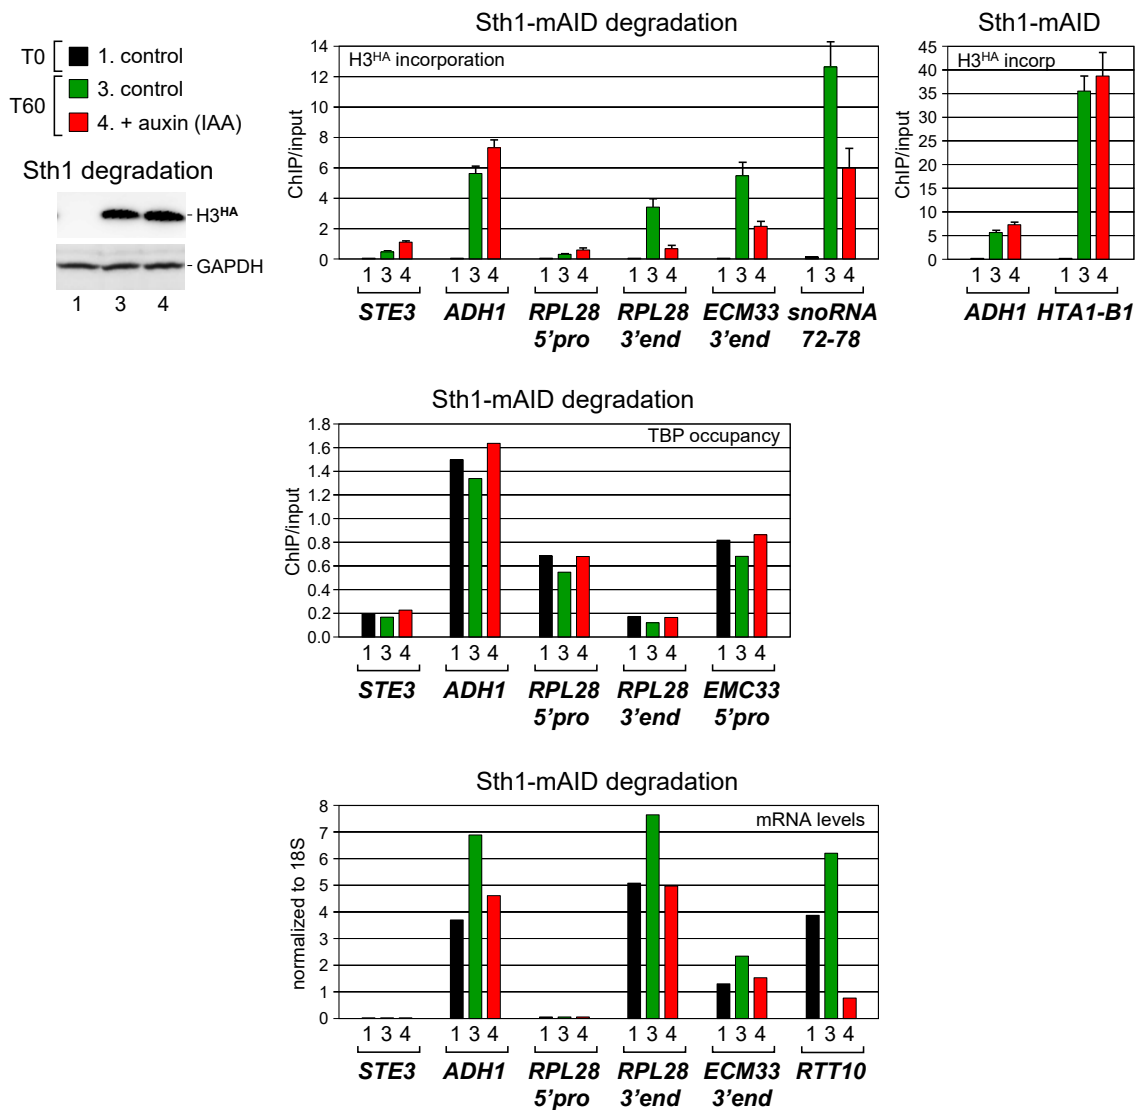

**Fig. S4. Histone exchange in the absence of RSC. Related to Fig. 6.**

Upper panels: Yeast cells expressing the essential RSC complex subunit Sth1 fused to mini-AID (mAID) were arrested in G1 by alpha factor. Auxin (IAA) was added or not 30 min prior to galactose activation of H3<sup>HA</sup> to induce degradation of Sth1-mAID. H3<sup>HA</sup> incorporation was measured at the indicated gene promoters and 3' ends as before. Shown are the mean and SD of triplicate cultures. On the left is the sample color code and a Western blot analysis for H3<sup>HA</sup> expression. See fig. S5 for experimental details. *RPL28* (Fig. 1A) and *ECM33* (fig. S1B) are two genes showing TBP-dependent histone exchange at their 3' ends.

Middle and lower panels: TBP occupancy and mRNA levels for the indicated genes were monitored by RT-qPCR and quantitative ChIP under the same experimental conditions as above. Expression of *RTT10* is dependent on RSC (35) and serves as a control for auxin-induced degradation of Sth1. Note that HIR-mediated H3<sup>HA</sup> incorporation at the histone *HTA1-HTB1* locus is unaffected by inactivation of RSC.

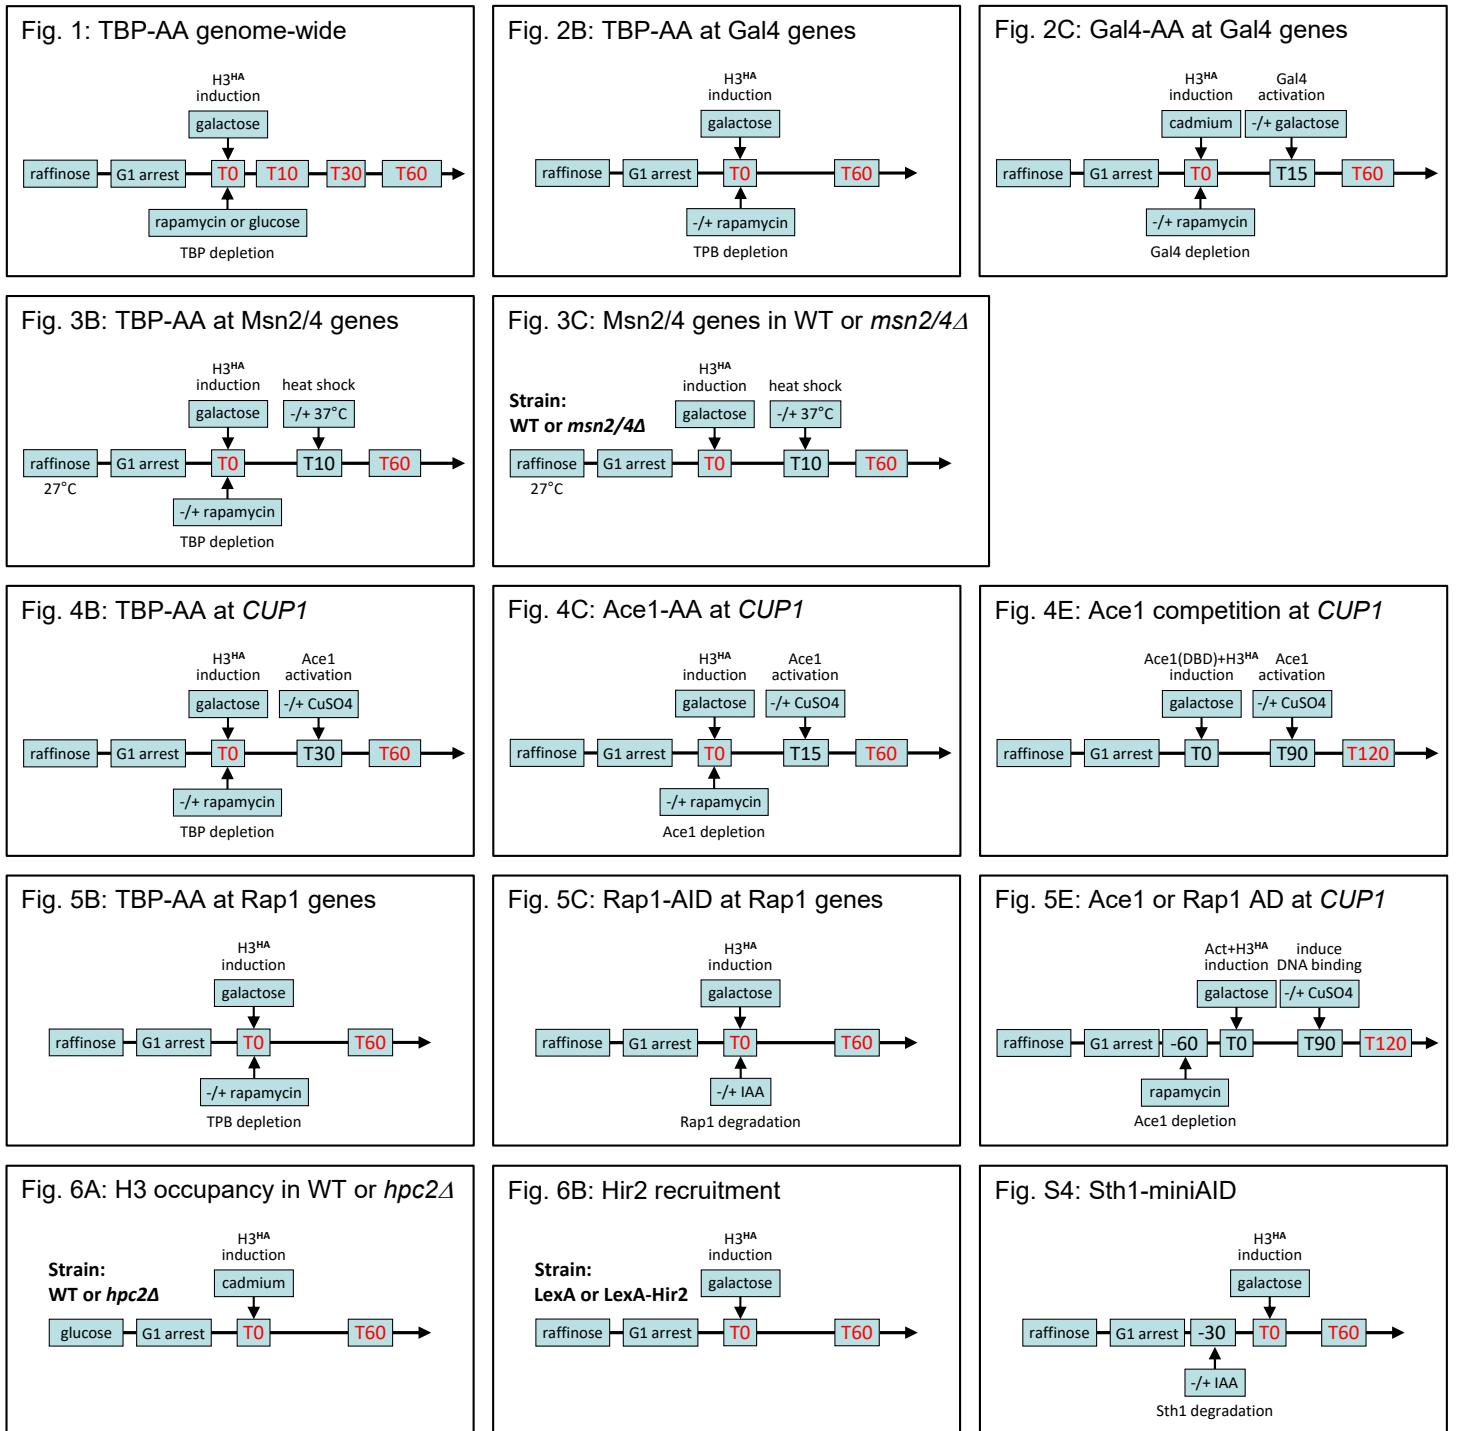

**Fig. S5. Experimental schemes.**

Schematic diagram illustrating the experiments presented in the indicated figures. Measurements were made at the time points indicated in red.



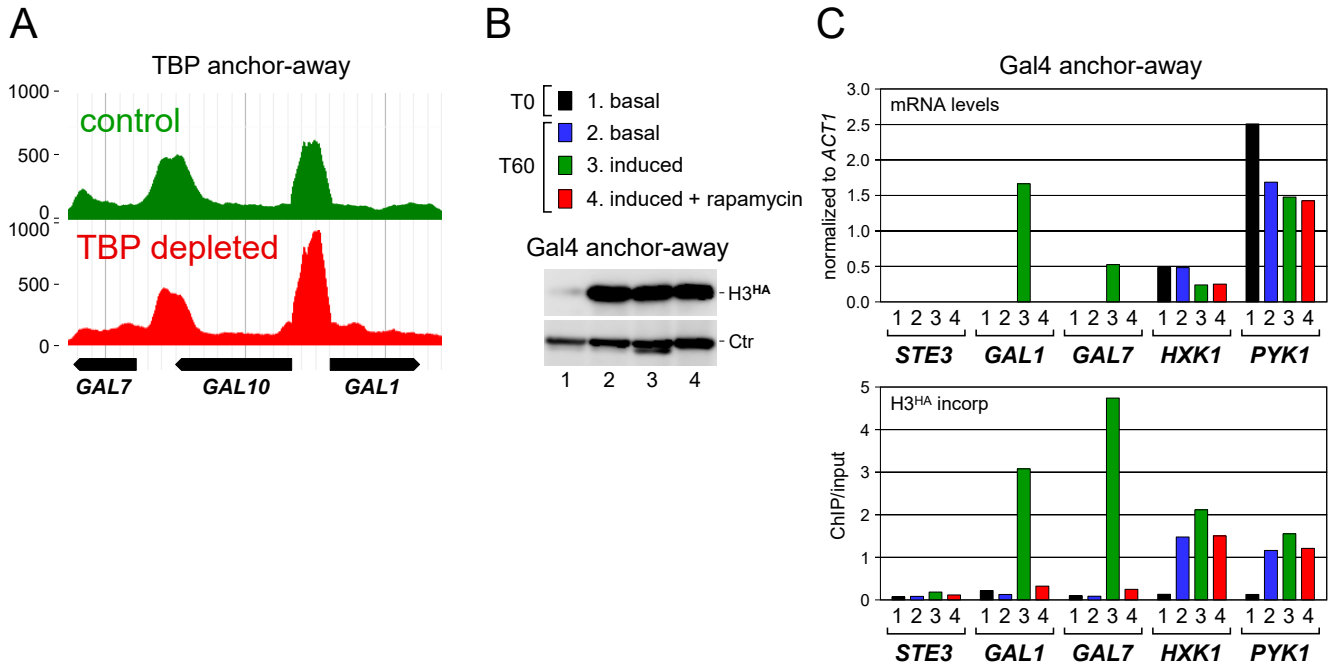

**Fig. S6. Independent biological replicate of Fig. 2.**

Same experiments as in Fig. 2 except that (A) shows a genome browser view of H3<sup>HA</sup> incorporation at the *GAL* gene cluster. The data are presented as in Fig. 1B but without normalization to H3 occupancy. Shown in (B) is the sample color code and a Western blot analysis for H3<sup>HA</sup> expression in the Gal4 anchor-away experiment presented in (C). Ctr: cross-reactive band that serves as loading control.

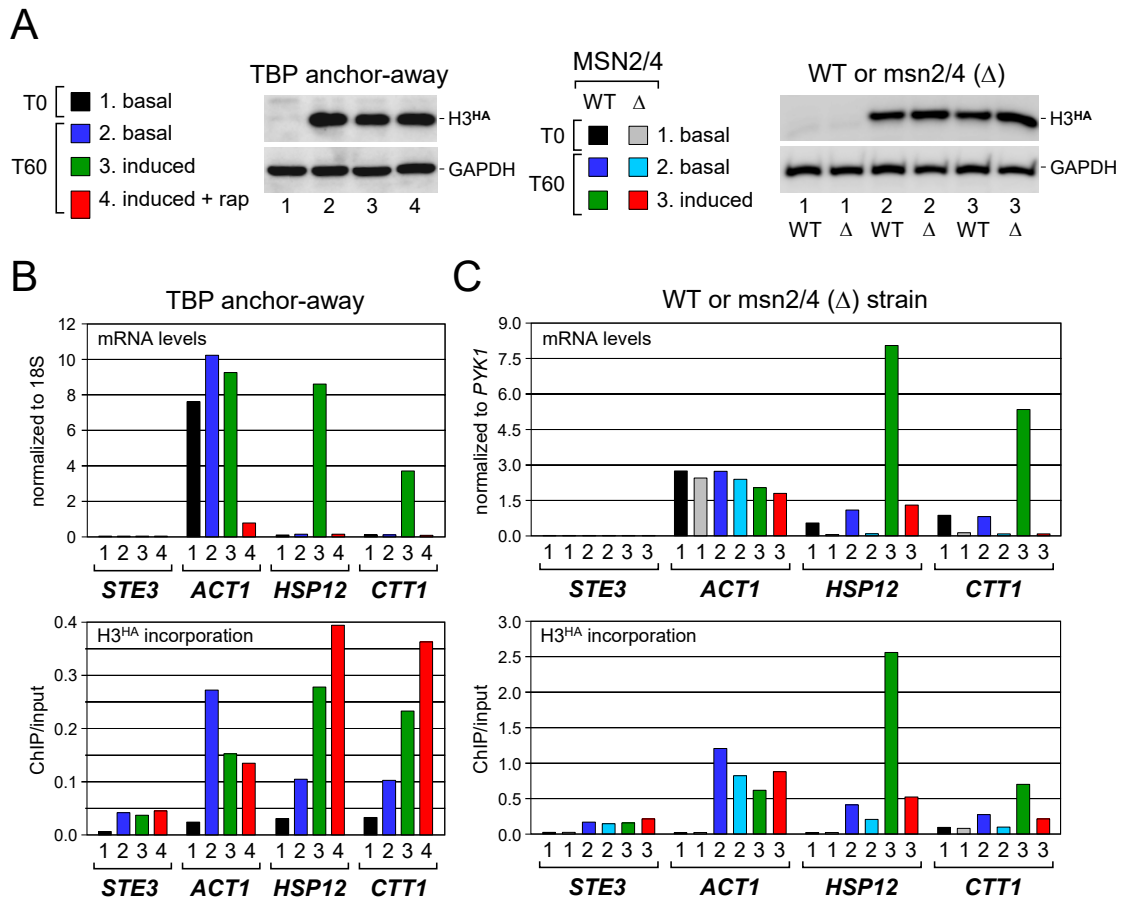

**Fig. S7. Independent biological replicate of Fig. 3.**

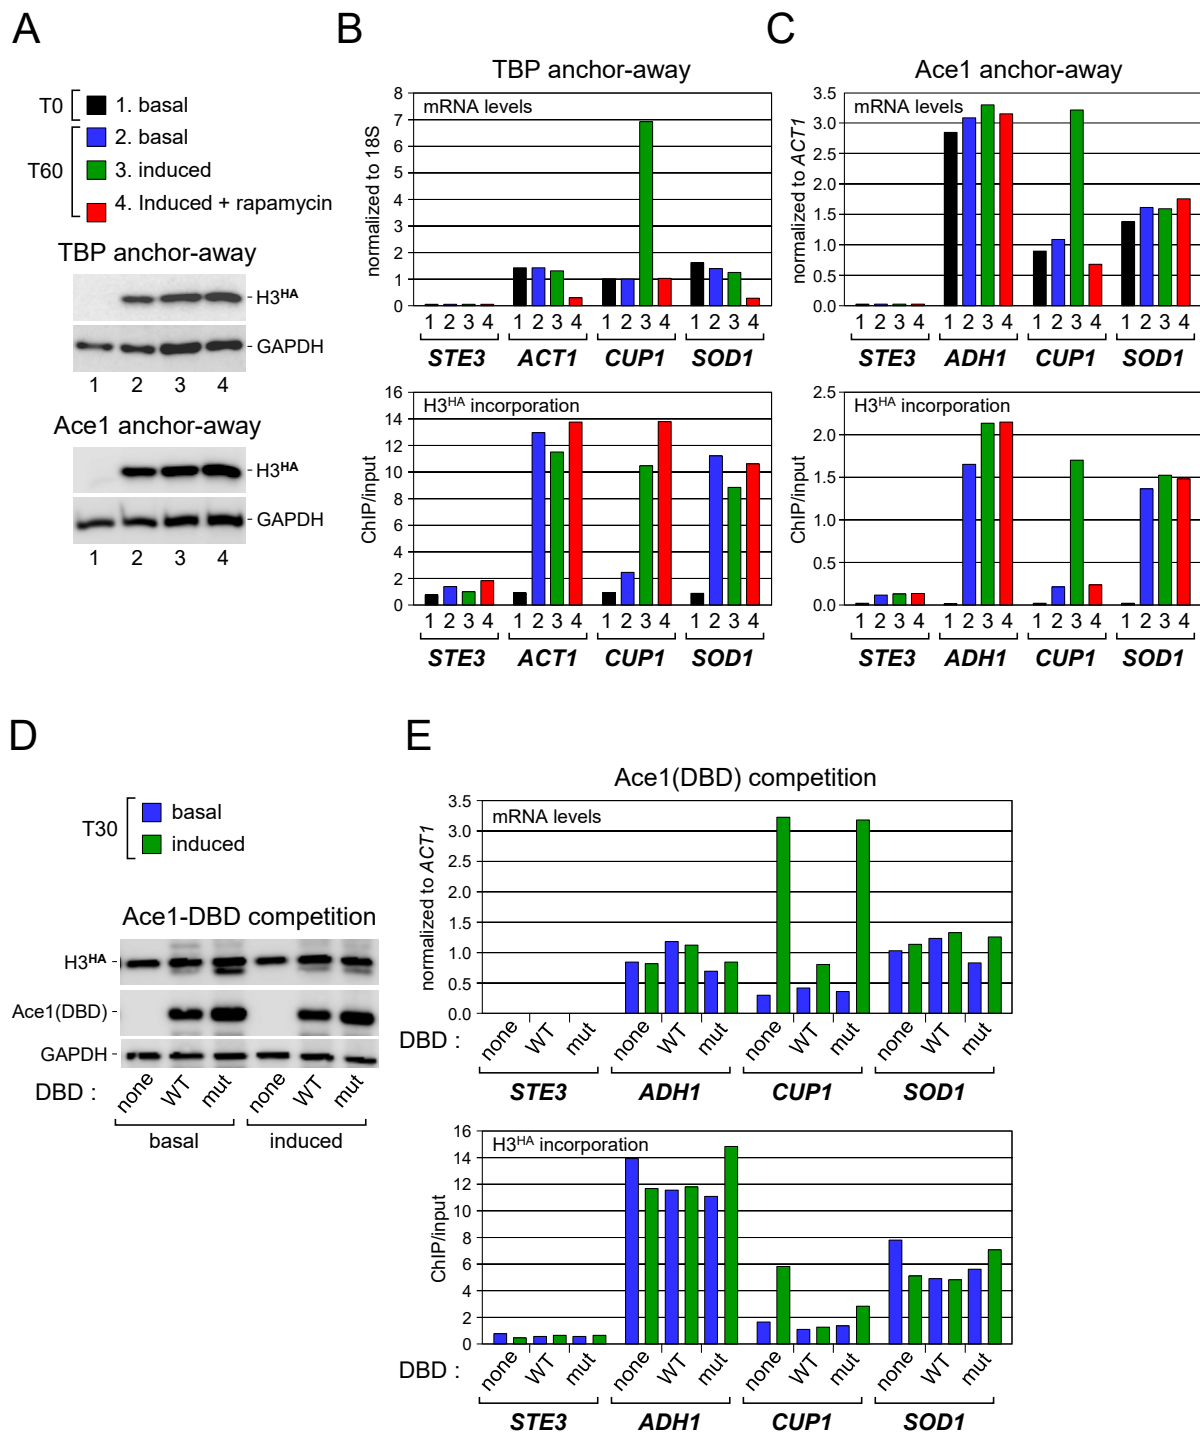

Fig. S8. Independent biological replicate of Fig. 4.

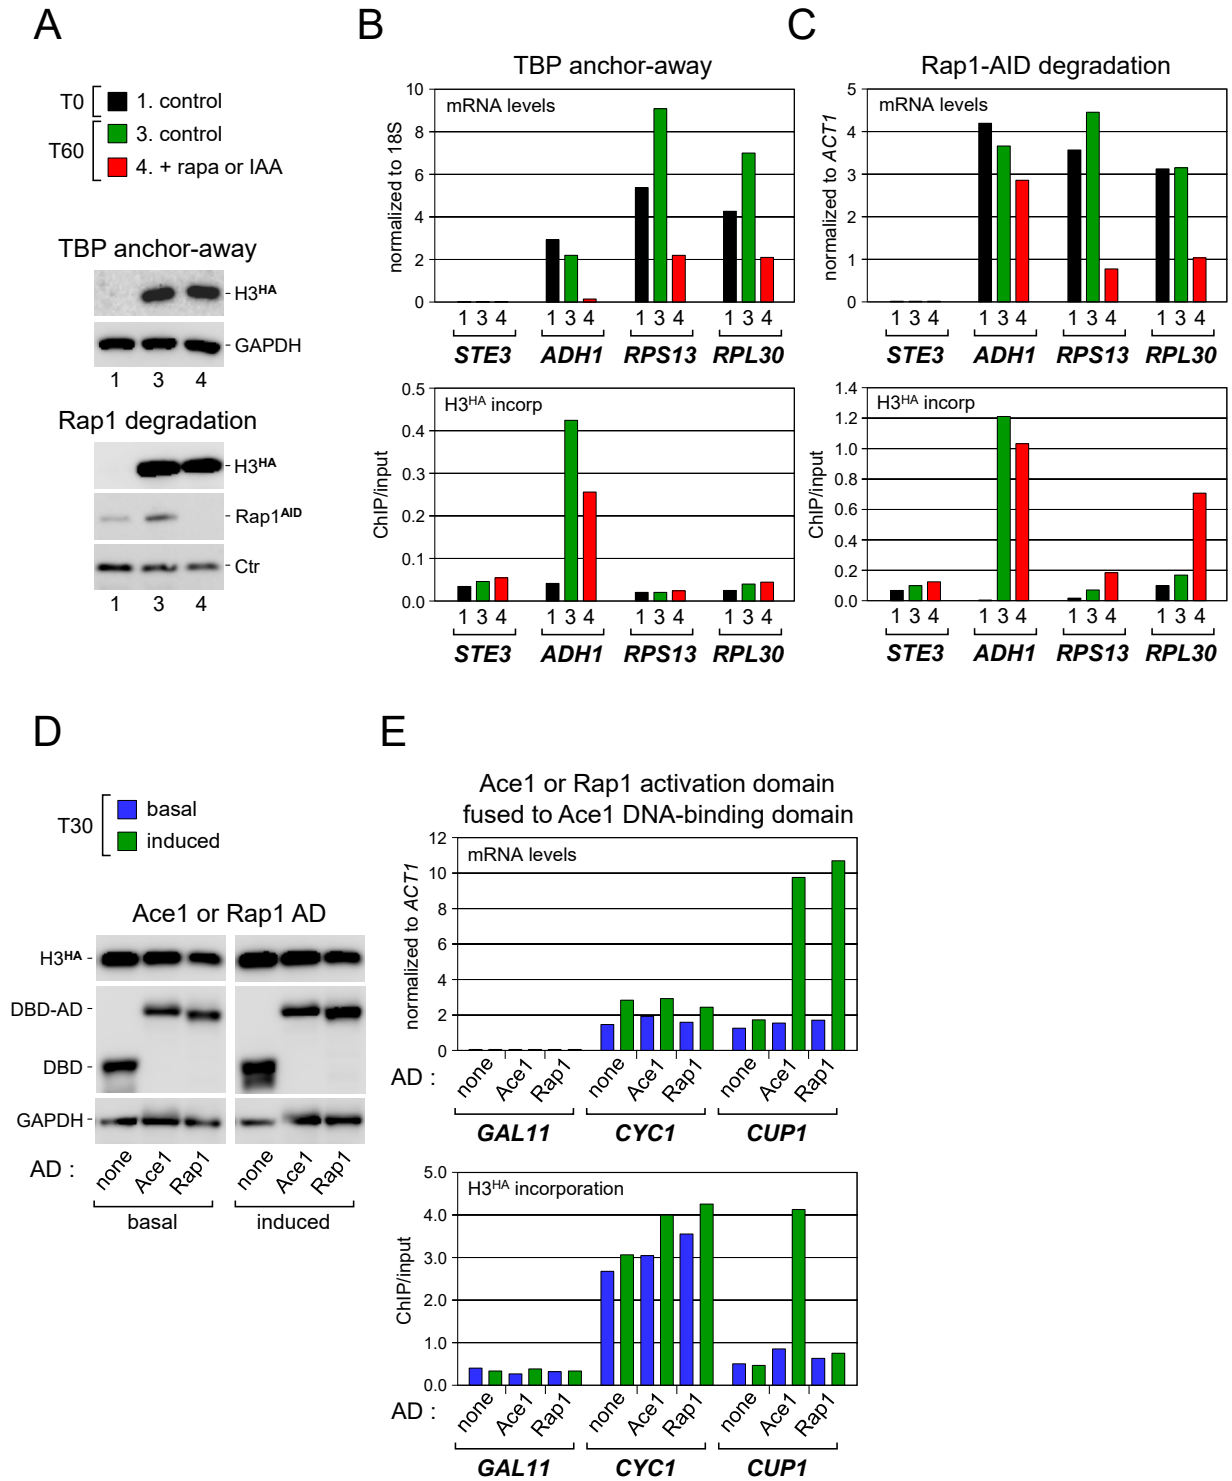

Fig. S9. Independent biological replicate of Fig. 5.

**A**

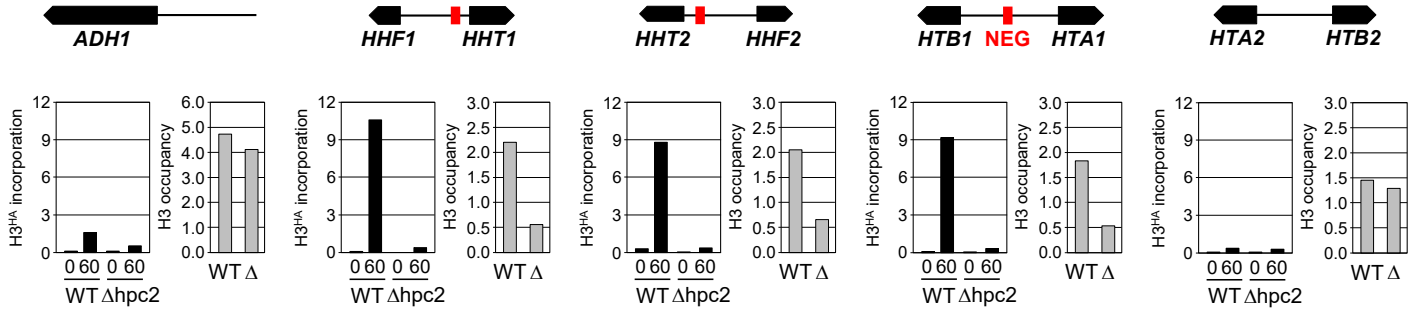

**B**

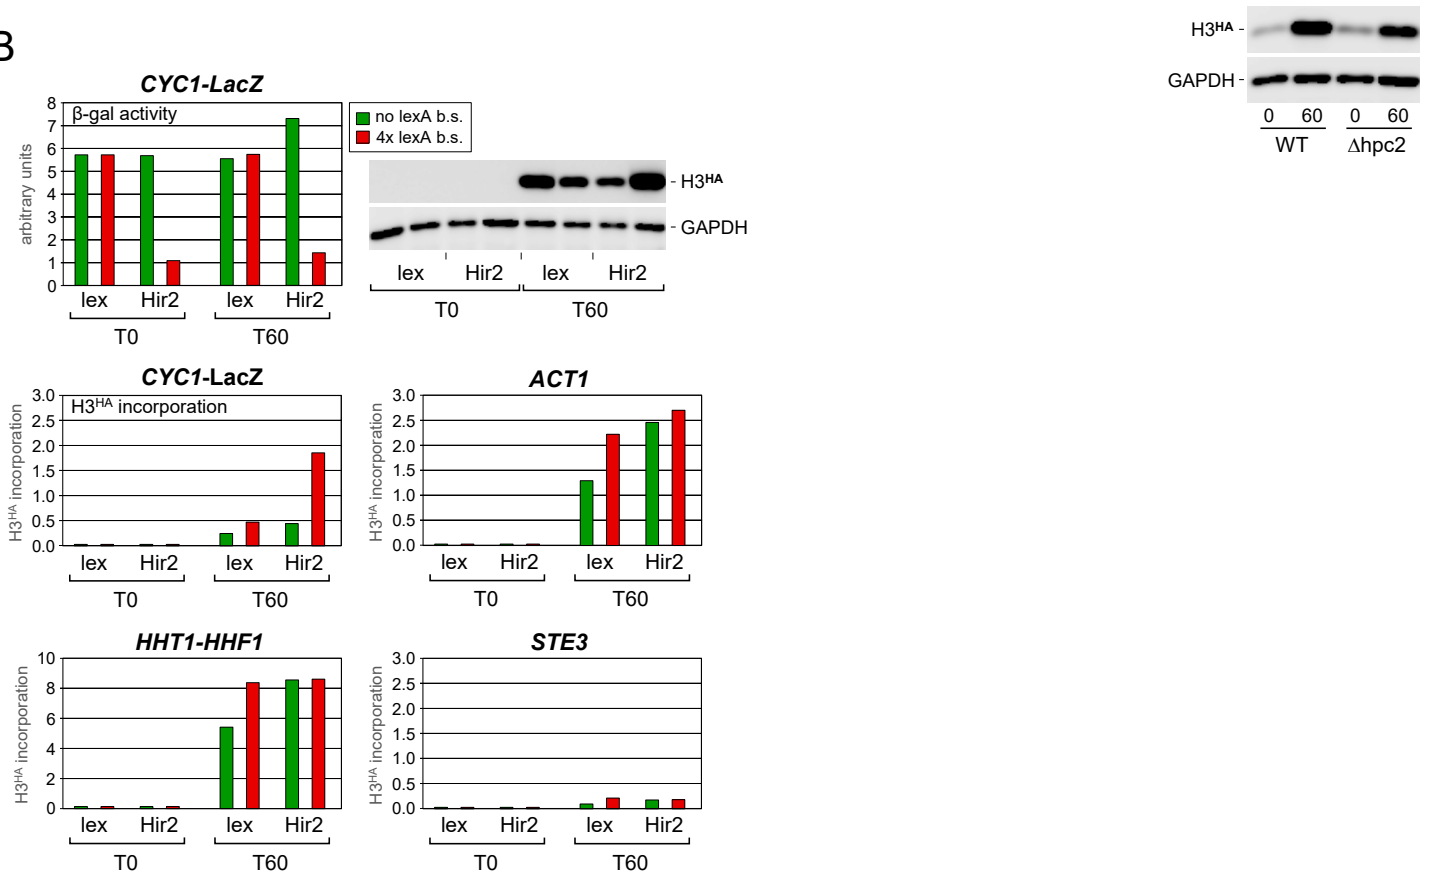

**Fig. S10. Independent biological replicate of Fig. 6.**

## Supplementary Table S1

### Yeast strains

| Strain         | Relevant genotype                                                                               | Figure                                                       | Source     |
|----------------|-------------------------------------------------------------------------------------------------|--------------------------------------------------------------|------------|
| HHY221         | <i>MATa, tor1-1, fpr1::loxP-LEU2-loxP, RPL13A-2×FKBP12::loxP, ade2-1, trp1-1, his3-11, ura3</i> |                                                              | (17)       |
| HH4            | HHY221; <i>bar1::URA3</i>                                                                       |                                                              | (10)       |
| SKY50          | HH4; <i>GAL4-FRB-HISM3, pRS314-GAL1pro-H3.HA</i>                                                | 2C                                                           | This study |
| SKY15          | HH4; <i>ACE1-FRB-HISM3</i>                                                                      |                                                              | This study |
| SKY23          | HH4; <i>ACE1-FRB-HISM3, pRS314-GAL1pro-H3.HA</i>                                                | 4A, 4C                                                       | This study |
| HHY154         | <i>MATα, ade2-1, ura3-1, tor1-1, fpr1::NAT, TBP1-FRB::KAN, RPL13A-2×FKBP12::TRP1</i>            |                                                              | (17)       |
| YG19           | HHY154; <i>MATa, bar1::URA3</i>                                                                 |                                                              | (10)       |
| SKY12          | YG19; <i>pRSADE-GAL1pro-H3.HA</i>                                                               | 1A-1C, 2A, 2B, 3A, 3B, 4A, 4B, 5A, 5B, 6A, S1, S2A, S2B, S3A | This study |
| YG31           | YG19; <i>hpc2::LEU2</i>                                                                         |                                                              | This study |
| SKY54          | YG31; <i>pRSADE-MET3pro-H3.HA</i>                                                               | 6A                                                           | This study |
| W303-1A        | <i>MATa, leu2-3,112, his3-11,15 ura3-1, ade2-1, trp1-1, can1-100</i>                            |                                                              | (25)       |
| Wmsn2-<br>msn4 | W303-1A; <i>msn2-Δ3::HIS3, msn4-1::TRP1</i>                                                     |                                                              | (25)       |
| SKY65          | W303-1A; <i>bar1::KANMX3, pRSADE-GAL1pro-H3.HA</i>                                              | 3A, 3C                                                       | This study |
| SKY66          | Wmsn2- <i>msn4</i> ; <i>bar1::KANMX3, pRSADE-GAL1pro-H3.HA</i>                                  | 3A, 3C                                                       | This study |

|          |                                                                              |             |                       |
|----------|------------------------------------------------------------------------------|-------------|-----------------------|
| RH932.5A | <i>MATa, trp1, bar1-1</i>                                                    |             | Howard Riezman        |
| SKY84    | RH932.5A; <i>pBTM116-HIR2 + pAJ1+ pRSADE-GAL1pro-H3.HA</i>                   | 6B          | This study            |
| SKY86    | RH932.5A; <i>pBTM116-HIR2 + pJK1621+ pRSADE-GAL1pro-H3.HA</i>                | 6B          | This study            |
| SKY88    | RH932.5A; <i>pBTM116 + pAJ1+ pRSADE-GAL1pro-H3.HA</i>                        | 6B          | This study            |
| SKY89    | RH932.5A; <i>pBTM116 + pJK1621+ pRSADE-GAL1pro-H3.HA</i>                     | 6B          | This study            |
| SKY56    | RH932.5A; <i>pRS314-GAL1pro-H3.HA + p793</i>                                 | 4D, 4E      | This study            |
| SKY57    | RH932.5A; <i>pRS314-GAL1pro-H3.HA + p1883</i>                                | 4D, 4E      | This study            |
| SKY58    | RH932.5A; <i>pRS314-GAL1pro-H3.HA + p1885</i>                                | 4D, 4E      | This study            |
| YJB25    | <i>MATa, HIS3, ADE2, pRS306Padh1.OsTIR1, pRAP1-AID-LEU2</i>                  |             | (58)                  |
| SKY44    | YJB25; <i>bar1::KANMX3, pRS314-GAL1pro-H3.HA</i>                             | 5A, 5C, S3B | This study            |
| SKY113   | SKY15; <i>ura3::KANMX3</i>                                                   |             | This study            |
| SKY114   | SKY113; <i>pRS314-GAL1pro-H3.HA + p793</i>                                   | 5D, 5E, S3C | This study            |
| SKY115   | SKY113; <i>pRS314-GAL1pro-H3.HA + p1883</i>                                  | 5D, 5E      | This study            |
| SKY116   | SKY113; <i>pRS314-GAL1pro-H3.HA + p1883-ACE1(AD)</i>                         | 5D, 5E, S3C | This study            |
| SKY117   | SKY113; <i>pRS314-GAL1pro-H3.HA + p1883-RAP1(AD)</i>                         | 5D, 5E      | This study            |
| SKY164   | <i>MATa, HIS3, ADE2, pRS306Padh1.OsTIR1, STH1-miniAID-KANMX3, bar1::HYGB</i> |             | gift from David Shore |
| SKY165   | SKY164; <i>pRSADE-GAL1pro-H3.HA</i>                                          | S4          | This study            |

## Supplementary Table S2

### Plasmids

| Plasmid name     | Description                                                                                          | Marker | Source     |
|------------------|------------------------------------------------------------------------------------------------------|--------|------------|
|                  | pRS314-GAL1pro-H3.HA                                                                                 | TRP1   | (10)       |
|                  | pRSADE-GAL1pro-H3.HA                                                                                 | ADE2   | (10)       |
|                  | pRSADE-MET3pro-H3.HA                                                                                 | ADE2   | This study |
| p793 (GFP-pYeF2) | pYeF2-GAL1pro-GFP                                                                                    | URA3   | (28)       |
| p1883            | pYeF2-GAL1pro-Ace1(DBD:WT).GFP                                                                       | URA3   | (28)       |
| p1885            | pYeF2-GAL1pro-Ace1(DBD:G37Q).GFP                                                                     | URA3   | (28)       |
| p1883-ACE1(AD)   | pYeF2-GAL1pro-Ace1(DBD:WT).Ace1(AD).GFP                                                              | URA3   | This study |
| p1883-RAP1(AD)   | pYeF2-GAL1pro-Ace1(DBD:WT).Rap1(AD).GFP                                                              | URA3   | This study |
| pBTM116          | pBTM116-ADH1pro-LexA                                                                                 | TRP1   | (36)       |
| pBTM116-HIR2     | pBTM116-ADH1pro-LexA.HIR2                                                                            | TRP1   | (36)       |
| pAJ1             | pAJ1-CYC1pro-LACZ reporter without LexA-binding sites                                                | URA3   | (36, 60)   |
| pJK1621          | pAJ1-CYC1pro-LACZ reporter carrying four LexA-binding sites upstream of the <i>CYC1</i> UAS elements | URA3   | (36, 60)   |



## Supplemental Table S3

### Cloning PCR amplification primers

| Name   | Description      | Sequence                                          | Comments                                                                                                                      |
|--------|------------------|---------------------------------------------------|-------------------------------------------------------------------------------------------------------------------------------|
| MS2293 | ClaI RAP1 AD Fw  | CC <u>ATCGAT</u> gcAATTATAGTTCTCAAAGAAATG TTCAGCC | Cla1 site underlined; used to generate p1883-RAP1(AD). The bases in lower case have been added to keep the reading frame open |
| MS2294 | ClaI RAP1 AD Rev | CC <u>ATCGAT</u> tTGGTGGAAAGCTTATGGTATCAGG        | Cla1 site underlined; same                                                                                                    |
| MS2295 | ClaI ACE1 AD Fw  | CC <u>ATCGAT</u> gcCTGGACGTTCTTTTGGGCC            | Cla1 site underlined; used to generate p1883-ACE1(AD). The bases in lower case have been added to keep the reading frame open |
| MS2296 | ClaI ACE1 AD Rev | CC <u>ATCGAT</u> tTTGTGAATGTGAGTTATGCGAAG         | Cla1 site underlined; same                                                                                                    |
| MS1730 | KpnI MET3pro Fw  | CGCGGT <u>ACCAAT</u> GAAAACACAGAAGTA              | Kpn1 site underlined; used to generate pRSADE-MET3pro-H3.HA                                                                   |
| MS1734 | MscI MET3pro Rev | GCGT <u>GGCCATACT</u> TTTATTCTTGTTATTA            | Msc1 site underlined; same                                                                                                    |

### ChIP qPCR primers

| Name   | Description  | Sequence                | Comments |
|--------|--------------|-------------------------|----------|
| MS819  | ACT1 PRO Fw  | GCGCTAGAACATAACCAGAATC  |          |
| MS820  | ACT1 PRO Rev | TCTTCCTTCCCCTTTCTACTC   |          |
| MS291  | ADH1 PRO Fw  | CACGCACACTACTCTCTAATGAG |          |
| MS290  | ADH1 PRO Rev | CTGGGATAGACATTGTATATGAG |          |
| MS2056 | CTT1 PRO Fw  | ATGAGTACGTCGCCGATC      |          |
| MS2057 | CTT1 PRO Rev | GTCCAGGCTACGTCGAAT      |          |
| MS1922 | CUP1 PRO Fw  | ACTTCACCACCCTTTATTTTC   |          |

|        |                   |                              |                                                          |
|--------|-------------------|------------------------------|----------------------------------------------------------|
| MS1923 | CUP1 PRO Rev      | CTGACAATCCATATTGCGTT         |                                                          |
| MS1141 | CYC1 PRO Fw       | GATGGCCAGGCAACTTTA           |                                                          |
| MS1142 | CYC1 PRO Rev      | ATGCTGCAAAGGTCTCTAA          |                                                          |
| MS2054 | CYC1-LACZ PRO Fw  | TGTGCGACGACACATGATC          | Hybridizes to the CYC1 core promoter                     |
| MS2055 | CYC1-LACZ PRO Rev | GTGAGACGGGCAACAGCCAA         | Hybridizes at the junction between CYC1 and the LacZ ORF |
| MS2698 | EMC33 PRO Fw      | CGTTCATTTCGCTTCTACAC         |                                                          |
| MS2699 | EMC33 PRO Rev     | GCAGTAGCAGTCAAAGCG           |                                                          |
| MS2694 | EMC33 3'-end Fw   | GAACGGTGCCACATCTAC           |                                                          |
| MS2695 | EMC33 3'-end Rev  | GAGCAGCACCCCTTAGACT          |                                                          |
| MS699  | GAL1 PRO Fw       | GCTGCATAACCACTTTAAC          |                                                          |
| MS700  | GAL1 PRO Rev      | CTTTGCGCTAGAATTGAAC          |                                                          |
| MS705  | GAL7 PRO Fw       | CTTGGACCCGTAAGTTTCAC         |                                                          |
| MS706  | GAL7 PRO Rev      | TGCTGGTTACGAAGCAAGAC         |                                                          |
| MS1041 | GAL11 PRO Fw      | GCTGGTTCCACAAAGAAG           |                                                          |
| MS1042 | GAL11 PRO Rev     | ACGGCACTATACGAAACG           |                                                          |
| MS1599 | HHF1-HHT1 URR Fw  | ACCGTATTCGCGGGCATTTCG        | To amplify the regulatory region between HHF1 and HHT1   |
| MS1600 | HHF1-HHT1 URR Rev | ATAATGTATGGGACAATGCG         | Same                                                     |
| MS1601 | HHF2-HHT2 URR Fw  | ACATTGGGGCATAATGAACGC        | To amplify the regulatory region between HHF2 and HHT2   |
| MS1602 | HHF2-HHT2 URR Rev | TCTGGTCTGGTCTGCATTTTCG       | Same                                                     |
| MS1595 | HTA1-HTB1 URR Fw  | TCTTGATTTTAAATCCATCG         | To amplify the regulatory region between HTA1 and HTB1   |
| MS1596 | HTA1-HTB1 URR Rev | ATAGCTTCGCACAGTGAGGC         | Same                                                     |
| MS1905 | HTA2-HTB2 URR Fw  | CACCGCTTTATTAGGCGAAG         | To amplify the regulatory region between HTA2 and HTB2   |
| MS1906 | HTA2-HTB2 URR Rev | TTATGGCCCCCAGGTTAATG         | Same                                                     |
| MS2596 | HSP12 PRO Fw      | TGCGTTCTACTTCCTCAATTGC       |                                                          |
| MS2597 | HSP12 PRO Rev     | GCGTCAGACATTGTTGTATTTAGTTTTT |                                                          |
| MS1344 | HXK1 PRO Fw       | TGAGTATTGCAAGCCACA           |                                                          |
| MS1345 | HXK1 PRO Rev      | CTTCTGTTTCCTCCTTTTC          |                                                          |

|        |                  |                           |                                                            |
|--------|------------------|---------------------------|------------------------------------------------------------|
| MS2682 | KSH1 PRO Fw      | GTCGGCAGATTTCTCACC        |                                                            |
| MS2683 | KSH1 PRO Rev     | CAGGTGGGTTTATGCAGTG       |                                                            |
| MS2678 | OPI3 PRO Fw      | TGATGACCAGGGTAGGTG        |                                                            |
| MS2679 | OPI3 PRO Rev     | CAGTGGTCATTGCAGTGG        |                                                            |
| MS2700 | PIM1 PRO Fw      | ATTGCAGCAACGACAAGC        |                                                            |
| MS2701 | PIM1 PRO Rev     | AGACCCTTAGCACAGTGG        |                                                            |
| MS835  | PYK1 PRO Fw      | CCCCTTTCAAAGTTATTCTCTACTC |                                                            |
| MS836  | PYK1 PRO Rev     | GAACCAGCAACAACGTTTAATG    |                                                            |
| MS2208 | RPL28 PRO Fw     | CAGGGACCCACACATTAC        |                                                            |
| MS2209 | RPL28 PRO Rev    | GGAGAAAGCAAACGCCAT        |                                                            |
| MS2210 | RPL28 3'-end Fw  | TGGACATTGATCCCAGAAG       | Used to amplify the 3' end of the RPL28 open reading frame |
| MS2211 | RPL28 3'-end Rev | CTTCAGCCAACTTGGAGA        | Same                                                       |
| MS2236 | RPL30 PRO Fw     | TTCTGGATAGGACGCCAAC       |                                                            |
| MS2237 | RPL30 PRO Rev    | GATCCTTACTGCGGTGCTA       |                                                            |
| MS2228 | RPS13 PRO Fw     | ACCACCCATAAACCATAAAGT     |                                                            |
| MS2229 | RPS13 PRO Rev    | GTACAGAAGTGAAATCTCATTC    |                                                            |
| MS1924 | SOD1 PRO Fw      | GCCGCTTACTGGAAGTAC        |                                                            |
| MS1925 | SOD1 PRO Rev     | ACAGCTAAACATTTGCCC        |                                                            |
| MS588  | STE3 PRO Fw      | CAAAGCCCTATTATTGCTGAC     |                                                            |
| MS589  | STE3 PRO Rev     | TCTCCACAATTTGGGCAGAAG     |                                                            |
| MS2646 | snoRNA72-78 Fw   | TTACAGACGGTCAACTGC        |                                                            |
| MS2647 | snoRNA72-78 Rev  | GAGTCGTCCAAATAGTCAGC      |                                                            |

### Expression analysis qPCR primers

| Name  | Description  | Sequence              | Comments |
|-------|--------------|-----------------------|----------|
| MS825 | ACT1 ORF Fw  | GTCCAAGGCGACGTAACATAG |          |
| MS826 | ACT1 ORF Rev | GCCGGTAGAGATTTGACTGAC |          |

|        |               |                            |  |
|--------|---------------|----------------------------|--|
| MS315  | ADH1 ORF Fw   | TAGGTTCTTTGGCTGTTCAATACG   |  |
| MS316  | ADH1 ORF Rev  | CGGAAACGGAAACGTTGATGACACCG |  |
| MS2151 | CTT1 ORF Fw   | TGCCACGCTTGTAAGATC         |  |
| MS2152 | CTT1 ORF Rev  | CAAGGAACTCCCAAGCATT        |  |
| MS1898 | CUP1 ORF Fw   | GAAGGTCATGAGTGCCAATG       |  |
| MS1899 | CUP1 ORF Rev  | CATTTGTCGTCGCTGTTACAC      |  |
| MS2076 | CYC1 ORF Fw   | CTCTGGTCAAGCTGAAGG         |  |
| MS2077 | CYC1 ORF Rev  | CACCAAAGGCCATCTTGG         |  |
| MS701  | GAL1 ORF Fw   | GGGCCCCAAATGGCAACATAG      |  |
| MS702  | GAL1 ORF Rev  | GCCCAATGCTGGTTTAGAGAC      |  |
| MS737  | GAL7 ORF Fw   | CTCTTTGAGGCTCACCTAAC       |  |
| MS738  | GAL7 ORF Rev  | GCTCCTTTGAATGCGACTG        |  |
| MS1043 | GAL11 ORF Fw  | GAAAGTGGCACCTATTCC         |  |
| MS1044 | GAL11 ORF Rev | CTTCGCAGCTTCCATATC         |  |
| MS2002 | HSP12 ORF Fw  | AGCTTTGAAGCCAGACTCTCA      |  |
| MS406  | HSP12 ORF Rev | CAGAGTCGTGGACACCTTGGGA     |  |
| MS903  | HXK1 ORF Fw   | TGTAGCAATGGGACGACATC       |  |
| MS904  | HXK1 ORF Rev  | AACACCAAGGACACCTTACC       |  |
| MS2666 | KSH1 ORF Fw   | TTCGTTCTCTTCTGCAAGTG       |  |
| MS2667 | KSH1 ORF Rev  | GACTGGCCCTTTCACCAA         |  |
| MS2600 | OPI3 ORF Fw   | TGGGTGTGGCTCTCTTTG         |  |
| MS2601 | OPI3 ORF Rev  | GACAAAGTGAACCCTGG          |  |
| MS2702 | PIM1 ORF Fw   | AGGCGTCTATCCACTTGC         |  |
| MS2703 | PIM1 ORF Rev  | CTCAACCCACCGATACGT         |  |
| MS839  | PYK1 ORF Fw   | CCAAGGGTCCAGAAATCAG        |  |
| MS840  | PYK1 ORF Rev  | CTTGTCATCGGTGGTGAAG        |  |
| MS2238 | RPL30 ORF Fw  | TTGCCGCTAACACTCCAG         |  |
| MS2239 | RPL30 ORF Rev | CAGAGTCACCAGCTTCCA         |  |
| MS2230 | RPS13 ORF Fw  | GGTTTGGCTCCAGAAATCC        |  |
| MS2231 | RPS13 ORF Rev | GGTGGTAAGACAGCAACAG        |  |

|        |               |                            |  |
|--------|---------------|----------------------------|--|
| MS2692 | RTT10 ORF Fw  | CGCGCTTGGGAAATTACC         |  |
| MS2693 | RTT10 ORF Rev | CCAACACCTCCGATCAGT         |  |
| MS1902 | SOD1 ORF Fw   | ACCTCCGTTGTAGGCAGAAG       |  |
| MS1903 | SOD1 ORF Rev  | CGGCATTACCAGTCTTCAA        |  |
| MS591  | STE3 ORF Fw   | CGTCAAGGACCTTGTGATTAGC     |  |
| MS590  | STE3 ORF Rev  | GCGCCACAAATGACCATATAAGC    |  |
| MS1237 | 18S RNA Fw    | CCTGAGAAACGGCTACCACATC     |  |
| MS1238 | 18S RNA Rev   | ATTGTCACTACCTCCCTGAATTAGGA |  |

## Supplemental Table S4

### List of non-RP and RP genes used for fig. S3A

|    | <b>non-RP genes</b> | <b>RP genes</b> |    | <b>non-RP genes</b> | <b>RP genes</b> |
|----|---------------------|-----------------|----|---------------------|-----------------|
| 1  | YAL040C             | YBL087C         | 14 | YKL189W             | YKL180W         |
| 2  | YBL029W             | YBR181C         | 15 | YLR023C             | YKR057W         |
| 3  | YBL042C             | YBR189W         | 16 | YLR354C             | YKR094C         |
| 4  | YBR114W             | YDR012W         | 17 | YML008C             | YLR029C         |
| 5  | YDR085C             | YDR064W         | 18 | YMR017W             | YLR287C-A       |
| 6  | YEL036C             | YDR500C         | 19 | YMR065W             | YLR441C         |
| 7  | YER045C             | YER056C-A       | 20 | YMR205C             | YML026C         |
| 8  | YER056C             | YER102W         | 21 | YOR274W             | YMR194W         |
| 9  | YER132C             | YFL034C-A       | 22 | YOR303W             | YMR230W         |
| 10 | YHR007C             | YGL147C         | 23 | YPL048W             | YOL120C         |
| 11 | YHR162W             | YGR085C         | 24 | YPL137C             | YOR167C         |
| 12 | YIL099W             | YHL033C         | 25 |                     | YPL198W         |
| 13 | YJR104C             | YJR094W-A       |    |                     |                 |

## REFERENCES AND NOTES

1. S. Venkatesh, J. L. Workman, Histone exchange, chromatin structure and the regulation of transcription. *Nat. Rev. Mol. Cell Biol.* **16**, 178–189 (2015).
2. C. Das, J. K. Tyler, Histone exchange and histone modifications during transcription and aging. *Biochim. Biophys. Acta* **1819**, 332–342 (2013).
3. P. B. Talbert, S. Henikoff, Histone variants on the move: Substrates for chromatin dynamics. *Nat. Rev. Mol. Cell Biol.* **18**, 115–126 (2017).
4. A. M. Deaton, M. Gómez-Rodríguez, J. Mieczkowski, M. Y. Tolstorukov, S. Kundu, R. I. Sadreyev, L. E. Jansen, R. E. Kingston, Enhancer regions show high histone H3.3 turnover that changes during differentiation. *eLife* **5**, e15316 (2016).
5. D. C. Kraushaar, W. Jin, A. Maunakea, B. Abraham, M. Ha, K. Zhao, Genome-wide incorporation dynamics reveal distinct categories of turnover for the histone variant H3.3. *Genome Biol.* **14**, R121 (2013).
6. A. Jamai, R. M. Imoberdorf, M. Strubin, Continuous histone H2B and transcription-dependent histone H3 exchange in yeast cells outside of replication. *Mol. Cell* **25**, 345–355 (2007).
7. A. Weiner, T.-H. S. Hsieh, A. Appleboim, H. V. Chen, A. Rahat, I. Amit, O. J. Rando, N. Friedman, High-resolution chromatin dynamics during a yeast stress response. *Mol. Cell* **58**, 371–386 (2015).
8. W. K. M. Lai, B. F. Pugh, Understanding nucleosome dynamics and their links to gene expression and DNA replication. *Nat. Rev. Mol. Cell Biol.* **18**, 548–562 (2017).
9. C. M. Hammond, C. B. Strømme, H. Huang, D. J. Patel, A. Groth, Histone chaperone networks shaping chromatin function. *Nat. Rev. Mol. Cell Biol.* **18**, 141–158 (2017).
10. Y. Grimaldi, P. Ferrari, M. Strubin, Independent RNA polymerase II preinitiation complex dynamics and nucleosome turnover at promoter sites in vivo. *Genome Res.* **24**, 117–124 (2014).
11. F. J. van Werven, H. A. A. M. van Teeffelen, F. C. P. Holstege, H. T. M. Timmers, Distinct promoter dynamics of the basal transcription factor TBP across the yeast genome. *Nat. Struct. Mol. Biol.* **16**, 1043–1048 (2009).
12. S. J. Zanton, B. F. Pugh, Full and partial genome-wide assembly and disassembly of the yeast transcription machinery in response to heat shock. *Genes Dev.* **20**, 2250–2265 (2006).
13. S. Kubik, M. J. Bruzzone, P. Jacquet, J.-L. Falcone, J. Rougemont, D. Shore, Nucleosome stability distinguishes two different promoter types at all protein-coding genes in yeast. *Mol. Cell* **60**, 422–434 (2015).

14. H. S. Rhee, B. F. Pugh, Genome-wide structure and organization of eukaryotic pre-initiation complexes. *Nature* **483**, 295–301 (2012).
15. E. A. Sekinger, Z. Moqtaderi, K. Struhl, Intrinsic histone-DNA interactions and low nucleosome density are important for preferential accessibility of promoter regions in yeast. *Mol. Cell* **18**, 735–748 (2005).
16. S. L. Klemm, Z. Shipony, W. J. Greenleaf, Chromatin accessibility and the regulatory epigenome. *Nat. Rev. Genet.* **20**, 207–220 (2019).
17. H. Haruki, J. Nishikawa, U. K. Laemmli, The anchor-away technique: Rapid, conditional establishment of yeast mutant phenotypes. *Mol. Cell.* **31**, 925–932 (2008).
18. A. Vannini, P. Cramer, Conservation between the RNA polymerase I, II, and III transcription initiation machineries. *Mol. Cell* **45**, 439–446 (2012).
19. H. A. Zaidi, D. T. Auble, S. Bekiranov, RNA synthesis is associated with multiple TBP-chromatin binding events. *Sci. Rep.* **7**, 39631 (2017).
20. M. F. Dion, T. Kaplan, M. Kim, S. Buratowski, N. Friedman, O. J. Rando, Dynamics of replication-independent histone turnover in budding yeast. *Science* **315**, 1405–1408 (2007).
21. A. Rufiange, P.-É. Jacques, W. Bhat, F. Robert, A. Nourani, Genome-wide replication-independent histone H3 exchange occurs predominantly at promoters and implicates H3 K56 Acetylation and Asf1. *Mol. Cell* **27**, 393–405 (2007).
22. I. Tirosh, N. Barkai, Two strategies for gene regulation by promoter nucleosomes. *Genome Res.* **18**, 1084–1091 (2008).
23. C. L. Liu, T. Kaplan, M. Kim, S. Buratowski, S. L. Schreiber, N. Friedman, O. J. Rando, Single-nucleosome mapping of histone modifications in *S. cerevisiae*. *PLOS Biol.* **3**, e328 (2005).
24. F. S. Howe, H. Fischl, S. C. Murray, J. Mellor, Is H3K4me3 instructive for transcription activation? *Bioessays* **39**, e201600095 (2017).
25. E. Boy-Marcotte, G. Lagniel, M. Perrot, F. Bussereau, A. Boudsocq, M. Jacquet, J. Labarre, The heat shock response in yeast: Differential regulations and contributions of the Msn2p/Msn4p and Hsf1p regulons. *Mol. Microbiol.* **33**, 274–283 (1999).
26. P. Fürst, S. Hu, R. Hackett, D. Hamer, Copper activates metallothionein gene transcription by altering the conformation of a specific DNA binding protein. *Cell* **55**, 705–717 (1988).
27. E. B. Gralla, D. J. Thiele, P. Silar, J. S. Valentine, ACE1, a copper-dependent transcription factor, activates expression of the yeast copper, zinc superoxide dismutase gene. *Proc. Natl. Acad. Sci. U.S.A.* **88**, 8558–8562 (1991).



28. G. Keller, A. Bird, D. R. Winge, Independent metalloregulation of Ace1 and Mac1 in *Saccharomyces cerevisiae*. *Eukaryot. Cell* **4**, 1863–1871 (2005).
29. K. Nalley, S. A. Johnston, T. Kodadek, Proteolytic turnover of the Gal4 transcription factor is not required for function in vivo. *Nature* **442**, 1054–1057 (2006).
30. J. D. Lieb, X. Liu, D. Botstein, P. O. Brown, Promoter-specific binding of Rap1 revealed by genome-wide maps of protein–DNA association. *Nat. Genet.* **28**, 327–334 (2001).
31. A. Yarragudi, L. W. Parfrey, R. H. Morse, Genome-wide analysis of transcriptional dependence and probable target sites for Abf1 and Rap1 in *Saccharomyces cerevisiae*. *Nucleic Acids Res.* **35**, 193–202 (2007).
32. A. D. Amin, N. Vishnoi, P. Prochasson, A global requirement for the HIR complex in the assembly of chromatin. *Biochim. Biophys. Acta* **1819**, 264–276 (2012).
33. C. F. Kurat, J. Recht, E. Radovani, T. Durbic, B. Andrews, J. Fillingham, Regulation of histone gene transcription in yeast. *Cell. Mol. Life Sci.* **71**, 599–613 (2014).
34. P. R. Eriksson, D. Ganguli, V. Nagarajavel, D. J. Clark, Regulation of histone gene expression in budding yeast. *Genetics* **191**, 7–20 (2012).
35. S. Kubik, E. O’Duibhir, W. J. de Jonge, S. Mattarocci, B. Albert, J.-L. Falcone, M. J. Bruzzone, F. C. P. Holstege, D. Shore, Sequence-directed action of RSC remodeler and general regulatory factors modulates +1 nucleosome position to facilitate transcription. *Mol. Cell* **71**, 89–102.e5 (2018).
36. M. S. Spector, A. Raff, H. DeSilva, K. Lee, M. A. Osley, Hir1p and Hir2p function as transcriptional corepressors to regulate histone gene transcription in the *Saccharomyces cerevisiae* cell cycle. *Mol. Cell. Biol.* **17**, 545–552 (1997).
37. M. W. Adkins, J. K. Tyler, Transcriptional activators are dispensable for transcription in the absence of Spt6-mediated chromatin reassembly of promoter regions. *Mol. Cell* **21**, 405–416 (2006).
38. K. Struhl, Fundamentally different logic of gene regulation in eukaryotes and prokaryotes. *Cell* **98**, 1–4 (1999).
39. G. E. Zentner, S. Henikoff, Regulation of nucleosome dynamics by histone modifications. *Nat. Struct. Mol. Biol.* **20**, 259–266 (2013).
40. C.-M. Chow, A. Georgiou, H. Szutorisz, A. Maia e Silva, A. Pombo, I. Barahona, E. Dargelos, C. Canzonetta, N. Dillon, Variant histone H3.3 marks promoters of transcriptionally active genes during mammalian cell division. *EMBO Rep.* **6**, 354–360 (2005).
41. P. Ferrari, M. Strubin, Uncoupling histone turnover from transcription-associated histone H3 modifications. *Nucleic Acids Res.* **43**, 3972–3985 (2015).

42. M. A. Osley, J. Gould, S. Kim, M. Kane, L. Hereford, Identification of sequences in a yeast histone promoter involved in periodic transcription. *Cell* **45**, 537–544 (1986).
43. E. M. Green, A. J. Antczak, A. O. Bailey, A. A. Franco, K. J. Wu, J. R. Yates, P. D. Kaufman, Replication-independent histone deposition by the HIR complex and Asf1. *Curr. Biol.* **15**, 2044 (2005).
44. P. Prochasson, L. Florens, S. K. Swanson, M. P. Washburn, J. L. Workman, The HIR corepressor complex binds to nucleosomes generating a distinct protein/DNA complex resistant to remodeling by SWI/SNF. *Genes Dev.* **19**, 2534–2539 (2005).
45. J. Fillingham, P. Kainth, J.-P. Lambert, H. van Bakel, K. Tsui, L. Peña-Castillo, C. Nislow, D. Figeys, T. R. Hughes, J. Greenblatt, B. J. Andrews, Two-color cell array screen reveals interdependent roles for histone chaperones and a chromatin boundary regulator in histone gene repression. *Mol. Cell* **35**, 340–351 (2009).
46. K. A. Garbett, M. K. Tripathi, B. Cencki, J. H. Layer, P. A. Weil, Yeast TFIID serves as a coactivator for Rap1p by direct protein-protein interaction. *Mol. Cell. Biol.* **27**, 297–311 (2007).
47. M. Mencía, Z. Moqtaderi, J. V. Geisberg, L. Kuras, K. Struhl, Activator-specific recruitment of TFIID and regulation of ribosomal protein genes in yeast. *Mol. Cell* **9**, 823–833 (2002).
48. H. Zhang, L. Gao, J. Anandhakumar, D. S. Gross, Uncoupling transcription from covalent histone modification. *PLOS Genet.* **10**, e1004202 (2014).
49. P. B. Becker, J. L. Workman, Nucleosome remodeling and epigenetics. *Cold Spring Harb. Perspect. Biol.* **5**, a017905 (2013).
50. Z. Hu, K. Chen, Z. Xia, M. Chavez, S. Pal, J.-H. Seol, C.-C. Chen, W. Li, J. K. Tyler, Nucleosome loss leads to global transcriptional up-regulation and genomic instability during yeast aging. *Genes Dev.* **28**, 396–408 (2014).
51. B. Langmead, S. L. Salzberg, Fast gapped-read alignment with Bowtie 2. *Nat. Methods* **9**, 357–359 (2012).
52. S. Heinz, C. Benner, N. Spann, E. Bertolino, Y. C. Lin, P. Laslo, J. X. Cheng, C. Murre, H. Singh, C. K. Glass, Simple combinations of lineage-determining transcription factors prime cis-regulatory elements required for macrophage and B cell identities. *Mol. Cell* **38**, 576–589 (2010).
53. A. R. Quinlan, I. M. Hall, BEDTools: A flexible suite of utilities for comparing genomic features. *Bioinformatics* **26**, 841–842 (2010).
54. A. M. Tsankov, D. A. Thompson, A. Socha, A. Regev, O. J. Rando, The role of nucleosome positioning in the evolution of gene regulation. *PLOS Biol.* **8**, e1000414 (2010).

55. H. Wickham, *ggplot2: Elegant Graphics for Data Analysis* (Springer-Verlag New York, 2016).
56. A. D. Basehoar, S. J. Zanton, B. F. Pugh, Identification and distinct regulation of yeast TATA box-containing genes. *Cell* **116**, 699–709 (2004).
57. A. Kassambara, *ggpubr: 'ggplot2' Based Publication Ready Plots*. R package version 0.2.5 (2020).
58. B. Knight, S. Kubik, B. Ghosh, M. J. Bruzzone, M. Geertz, V. Martin, N. Déneraud, P. Jacquet, B. Ozkan, J. Rougemont, S. J. Maerkl, F. Naef, D. Shore, Two distinct promoter architectures centered on dynamic nucleosomes control ribosomal protein gene transcription. *Genes Dev.* **28**, 1695–1709 (2014).
59. T. Candelli, D. Challal, J.-B. Briand, J. Boulay, O. Porrua, J. Colin, D. Libri, High-resolution transcription maps reveal the widespread impact of roadblock termination in yeast. *EMBO J.* **37**, e97490 (2018).
60. C. A. Keleher, M. J. Redd, J. Schultz, M. Carlson, A. D. Johnson, Ssn6-Tup1 is a general repressor of transcription in yeast. *Cell* **68**, 709–719 (1992).
